## COMMENTS AND RESPONSES

### Response to Comment on: Draznin et al. Pathways to Quality Inpatient Management of Hyperglycemia and Diabetes: A Call to Action. *Diabetes Care* 2013;36:1807- 1814

**W**e are pleased to hear from our British colleagues who agreed with our call to action to engage in more clinical research in order to generate data supporting the benefit of glycemic control in hospitalized patients with diabetes (1,2). This paucity of clinical evidence was indeed the impetus for organizing our consortium PRIDE (Planning Research in Inpatient Diabetes).

It is gratifying to learn that three major U.K. diabetes associations developed and posted online a series of national guidelines on management of inpatient diabetes (3). A similar effort in the U.S. was

presented by the American Association of Clinical Endocrinologists, American Diabetes Association, and Society of Hospital Medicine, which took this task very seriously (4,5).

The task of PRIDE is not to duplicate this effort but rather to develop clinical research in this field that can become a foundation for evidence-based guidelines used not only on both sides of the pond but in the rest of the world as well.

BORIS DRAZNIN, MD, PHD<sup>1</sup>

JANICE GILDEN, MS, MD<sup>2</sup>

SHERITA H. GOLDEN, MD, MHS<sup>3</sup>

SILVIO INZUCCHI, MD<sup>4</sup>

FOR THE PRIDE INVESTIGATORS

From the <sup>1</sup>Division of Endocrinology, Diabetes and Metabolism, University of Colorado School of Medicine, Aurora, Colorado; the <sup>2</sup>Division of Diabetes and Endocrinology, Department of Medicine, Chicago Medical School, Rosalind Franklin University of Medicine and Science, North Chicago, Illinois; the <sup>3</sup>Division of Endocrinology and Metabolism, Johns Hopkins University School of Medicine, Baltimore, Maryland; and the <sup>4</sup>Section of Endocrinology, Yale University School of Medicine, New Haven, Connecticut.

Corresponding author: Boris Draznin, [boris.draznin@ucdenver.edu](mailto:boris.draznin@ucdenver.edu).

DOI: 10.2337/dc13-1855

© 2013 by the American Diabetes Association. Readers may use this article as long as the work is properly cited, the use is educational and not for profit, and the work is not altered. See <http://creativecommons.org/licenses/by-nc-nd/3.0/> for details.

[creativecommons.org/licenses/by-nc-nd/3.0/](http://creativecommons.org/licenses/by-nc-nd/3.0/) for details.

**Acknowledgments**—No potential conflicts of interest relevant to this article were reported.

#### References

1. Dhatariya K, Sampson M, Walton C, Rayman G, Walden E, Kelly T. Comment on: Draznin et al. Pathways to quality inpatient management of hyperglycemia and diabetes: a call to action. *Diabetes Care* 2013;36:1807–1814 (Letter). *Diabetes Care* 2013;36:e219. DOI: 10.2337/dc13-1721
2. Draznin B, Gilden J, Golden SH, Inzucchi SE; PRIDE investigators. Pathways to quality inpatient management of hyperglycemia and diabetes: a call to action. *Diabetes Care* 2013;36:1807–1814
3. Joint British Diabetes Societies Inpatient Care Group. Available from <http://www.diabetes.org.uk/Documents/nhs-diabetes/commissioning/commissioning-guide-diabetes-emergency-inpatient-care-0611.pdf>. Accessed 21 October 2013
4. ACE/ADA Task Force on Inpatient Diabetes. American College of Endocrinology and American Diabetes Association Consensus statement on inpatient diabetes and glycemic control. *Diabetes Care* 2006; 29:1955–1962
5. Society of Hospital Medicine. Glycemic control resource room [Internet]. Available from [http://www.hospitalmedicine.org/ResourceRoomRedesign/html/04Best\\_Practices/references.cfm](http://www.hospitalmedicine.org/ResourceRoomRedesign/html/04Best_Practices/references.cfm). Accessed 21 October 2013
